# Supplementary material
Source: MDPI journal article supplement (doi:10.3390/horticulturae12060657)
Supplement: s1 [file horticulturae-4220225-supplementary.pdf › horticulturae-4220225-supplementary.pdf]

## Supplementary Materials

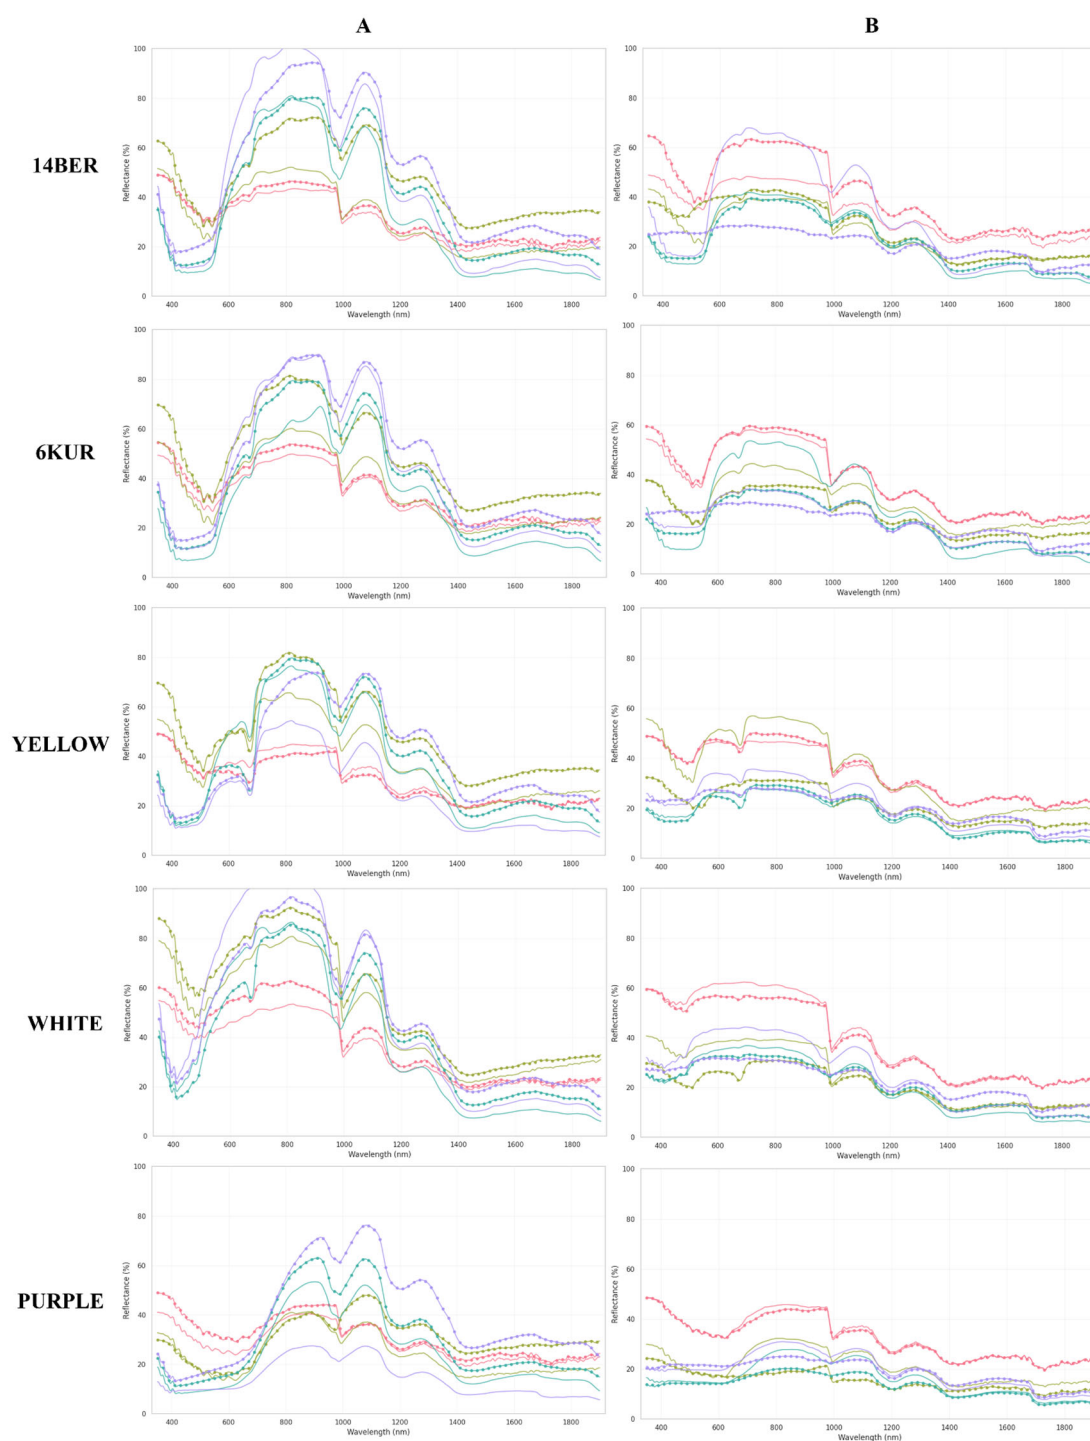

**Figure S1.** Spectral signature of five carrot genotypes subjected to two postharvest treatments (refrigeration and room temperature), evaluated in two tissue zones: A) external surface and B) cross-section. Solid lines represent samples stored under refrigeration, while dotted lines correspond to samples stored at room temperature.

**Table S1.** Three-way factorial ART ANOVA results (Genotype  $\times$  Storage treatment  $\times$  Storage time), including F-values, p-values, and effect sizes ( $\eta^2$ ), for postharvest quality attributes in carrot genotypes/varieties.

| Variable     | Effect        | Df   | Df.res | F_value  | P_value    | $\eta^2$ | Size   |
|--------------|---------------|------|--------|----------|------------|----------|--------|
| Firmness     | Genotype (G)  | 4.0  | 80.0   | 20.4359  | <0.001 *** | 0.5053   | Large  |
|              | Treatment (T) | 1.0  | 80.0   | 1.8738   | 0.175      | 0.0228   | Small  |
|              | Week (W)      | 3.0  | 80.0   | 7.5737   | <0.001 *** | 0.2211   | Large  |
|              | G+T           | 4.0  | 80.0   | 1.9354   | 0.113      | 0.0882   | Medium |
|              | G+W           | 12.0 | 80.0   | 3.5586   | <0.001 *** | 0.3480   | Large  |
|              | T+W           | 3.0  | 80.0   | 18.1376  | <0.001 *** | 0.4048   | Large  |
|              | G+T+W         | 12.0 | 80.0   | 1.7681   | 0.068      | 0.2096   | Large  |
| Fresh weight | Genotype (G)  | 4.0  | 80.0   | 109.0009 | <0.001 *** | 0.8449   | Large  |
|              | Treatment (T) | 1.0  | 80.0   | 238.2296 | <0.001 *** | 0.7486   | Large  |
|              | Week (W)      | 3.0  | 80.0   | 33.8428  | <0.001 *** | 0.5592   | Large  |
|              | G+T           | 4.0  | 80.0   | 18.6202  | <0.001 *** | 0.4821   | Large  |
|              | G+W           | 12.0 | 80.0   | 11.7839  | <0.001 *** | 0.6386   | Large  |
|              | T+W           | 3.0  | 80.0   | 18.5100  | <0.001 *** | 0.4097   | Large  |
|              | G+T+W         | 12.0 | 80.0   | 22.4331  | <0.001 *** | 0.7709   | Large  |
| TSS          | Genotype (G)  | 4.0  | 80.0   | 17.4604  | <0.001 *** | 0.4661   | Large  |
|              | Treatment (T) | 1.0  | 80.0   | 192.0167 | <0.001 *** | 0.7059   | Large  |
|              | Week (W)      | 3.0  | 80.0   | 88.5882  | <0.001 *** | 0.7686   | Large  |
|              | G+T           | 4.0  | 80.0   | 14.6632  | <0.001 *** | 0.4230   | Large  |
|              | G+W           | 12.0 | 80.0   | 7.5245   | <0.001 *** | 0.5302   | Large  |
|              | T+W           | 3.0  | 80.0   | 50.2625  | <0.001 *** | 0.6533   | Large  |
|              | G+T+W         | 12.0 | 80.0   | 6.5978   | <0.001 *** | 0.4974   | Large  |
| Respiration  | Genotype (G)  | 4.0  | 80.0   | 9.2124   | <0.001 *** | 0.3153   | Large  |
|              | Treatment (T) | 1.0  | 80.0   | 224.4979 | <0.001 *** | 0.7372   | Large  |
|              | Week (W)      | 3.0  | 80.0   | 6.8414   | <0.001 *** | 0.2041   | Large  |
|              | G+T           | 4.0  | 80.0   | 2.9106   | 0.027 *    | 0.1270   | Medium |
|              | G+W           | 12.0 | 80.0   | 3.6851   | <0.001 *** | 0.3559   | Large  |
|              | T+W           | 3.0  | 80.0   | 9.6350   | <0.001 *** | 0.2654   | Large  |

|    |               |      |      |          |            |        |        |
|----|---------------|------|------|----------|------------|--------|--------|
|    | G+T+W         | 12.0 | 80.0 | 4.7038   | <0.001 *** | 0.4136 | Large  |
| a* | Genotype (G)  | 4.0  | 80.0 | 153.0825 | <0.001 *** | 0.8844 | Large  |
|    | Treatment (T) | 1.0  | 80.0 | 13.9723  | <0.001 *** | 0.1487 | Large  |
|    | Week (W)      | 3.0  | 80.0 | 8.4709   | <0.001 *** | 0.2410 | Large  |
|    | G+T           | 4.0  | 80.0 | 5.8469   | <0.001 *** | 0.2262 | Large  |
|    | G+W           | 12.0 | 80.0 | 3.5558   | <0.001 *** | 0.3478 | Large  |
|    | T+W           | 3.0  | 80.0 | 2.4993   | 0.065      | 0.0857 | Medium |
|    | G+T+W         | 12.0 | 80.0 | 2.2731   | 0.015 *    | 0.2543 | Large  |
| b* | Genotype (G)  | 4.0  | 80.0 | 104.2590 | <0.001 *** | 0.8390 | Large  |
|    | Treatment (T) | 1.0  | 80.0 | 14.5486  | <0.001 *** | 0.1538 | Large  |
|    | Week (W)      | 3.0  | 80.0 | 11.8877  | <0.001 *** | 0.3083 | Large  |
|    | G+T           | 4.0  | 80.0 | 23.2493  | <0.001 *** | 0.5375 | Large  |
|    | G+W           | 12.0 | 80.0 | 6.9903   | <0.001 *** | 0.5118 | Large  |
|    | T+W           | 3.0  | 80.0 | 1.5781   | 0.201      | 0.0558 | Small  |
|    | G+T+W         | 12.0 | 80.0 | 2.4548   | 0.009 **   | 0.2691 | Large  |
| L* | Genotype (G)  | 4.0  | 80.0 | 127.9927 | <0.001 *** | 0.8648 | Large  |
|    | Treatment (T) | 1.0  | 80.0 | 0.4126   | 0.522      | 0.0051 | Small  |
|    | Week (W)      | 3.0  | 80.0 | 1.7448   | 0.164      | 0.0614 | Medium |
|    | G+T           | 4.0  | 80.0 | 4.8476   | 0.001 **   | 0.1950 | Large  |
|    | G+W           | 12.0 | 80.0 | 1.6708   | 0.089      | 0.2003 | Large  |
|    | T+W           | 3.0  | 80.0 | 3.7829   | 0.014 *    | 0.1242 | Medium |
|    | G+T+W         | 12.0 | 80.0 | 0.7352   | 0.713      | 0.0993 | Medium |

**Table S2.** Three-way factorial ART ANOVA results (Genotype × Storage treatment × Storage time) for spectral indices (mARI, NDVI, CRI1, and CRI2) measured in carrot roots during postharvest storage. Plants were subjected to two storage conditions (refrigeration and room temperature) and evaluated over four weeks. Measurements were conducted on the external tissue of the roots. Different letters indicate statistically significant differences among genotype × treatment combinations within each storage time, based on post hoc pairwise comparisons adjusted using the false discovery rate (FDR) method ( $p < 0.05$ ).

| Variable | Effect        | Df   | Df.res | F_value  | P_value    | $\eta^2$ | Size  |
|----------|---------------|------|--------|----------|------------|----------|-------|
| CRI1     | Genotype (G)  | 4.0  | 80.0   | 38.7829  | <0.001 *** | 0.6654   | Large |
|          | Treatment (T) | 1.0  | 80.0   | 85.3292  | <0.001 *** | 0.5224   | Large |
|          | Week (W)      | 3.0  | 80.0   | 70.7988  | <0.001 *** | 0.7314   | Large |
|          | G+T           | 4.0  | 80.0   | 32.1527  | <0.001 *** | 0.6224   | Large |
|          | G+W           | 12.0 | 80.0   | 21.7759  | <0.001 *** | 0.7701   | Large |
|          | T+W           | 3.0  | 80.0   | 34.9260  | <0.001 *** | 0.5732   | Large |
|          | G+T+W         | 12.0 | 80.0   | 18.4699  | <0.001 *** | 0.7396   | Large |
| CRI2     | Genotype (G)  | 4.0  | 80.0   | 70.2907  | <0.001 *** | 0.7828   | Large |
|          | Treatment (T) | 1.0  | 80.0   | 101.9757 | <0.001 *** | 0.5666   | Large |
|          | Week (W)      | 3.0  | 80.0   | 69.7993  | <0.001 *** | 0.7286   | Large |
|          | G+T           | 4.0  | 80.0   | 22.9636  | <0.001 *** | 0.5407   | Large |
|          | G+W           | 12.0 | 80.0   | 19.0961  | <0.001 *** | 0.7460   | Large |
|          | T+W           | 3.0  | 80.0   | 24.3683  | <0.001 *** | 0.4838   | Large |
|          | G+T+W         | 12.0 | 80.0   | 9.1542   | <0.001 *** | 0.5847   | Large |
| mARI     | Genotype (G)  | 4.0  | 80.0   | 75.3164  | <0.001 *** | 0.7943   | Large |
|          | Treatment (T) | 1.0  | 80.0   | 78.5713  | <0.001 *** | 0.5018   | Large |
|          | Week (W)      | 3.0  | 80.0   | 28.1749  | <0.001 *** | 0.5200   | Large |
|          | G+T           | 4.0  | 80.0   | 18.3226  | <0.001 *** | 0.4844   | Large |
|          | G+W           | 12.0 | 80.0   | 12.1429  | <0.001 *** | 0.6513   | Large |
|          | T+W           | 3.0  | 80.0   | 20.701 4 | <0.001 *** | 0.4432   | Large |
|          | G+T+W         | 12.0 | 80.0   | 7.6589   | <0.001 *** | 0.5409   | Large |
| NDVI     | Genotype (G)  | 4.0  | 80.0   | 42.4879  | <0.001 *** | 0.6854   | Large |
|          | Treatment (T) | 1.0  | 80.0   | 0.2387   | 0.626      | 0.0030   | Small |
|          | Week (W)      | 3.0  | 80.0   | 19.9263  | <0.001 *** | 0.4338   | Large |

|       |      |      |         |            |        |        |
|-------|------|------|---------|------------|--------|--------|
| G+T   | 4.0  | 80.0 | 15.0366 | <0.001 *** | 0.4353 | Large  |
| G+W   | 12.0 | 80.0 | 4.37486 | <0.001 *** | 0.4022 | Large  |
| T+W   | 3.0  | 80.0 | 4.00691 | 0.010 *    | 0.1335 | Medium |
| G+T+W | 12.0 | 80.0 | 6.59662 | <0.001 *** | 0.5036 | Large  |

**Table S3.** Evolution total carotenoid content (expressed as  $\beta$ -carotene) in five carrot genotypes (14BER, 6KUR, purple, yellow, and white) stored at room temperature and under refrigeration for four weeks. The table shows absolute concentration (ppm), relative percentage compared to Week 1 (initial value), and cumulative loss percentage. A logarithmic exploratory model was fitted to describe the degradation trend, with parameters estimated for each genotype and storage condition ( $\beta$ -carotene concentration =  $a + b \cdot \ln(\text{time})$ , where  $a$  and  $b$  represent the model coefficients).

| Material | Treatment        | Week | ppm<br>(Mean $\pm$ SD) | Loss percentage | Model       | Parameter A | Parameter B | R <sup>2</sup> |
|----------|------------------|------|------------------------|-----------------|-------------|-------------|-------------|----------------|
| 14BER    | Room temperature | 1    | 70.30 $\pm$ 2.15       | 0               | Logarithmic | -40.29ln(x) | 66.73       | 0.96           |
|          |                  | 2    | 31.85 $\pm$ 1.72       | 54.69           |             |             |             |                |
|          |                  | 3    | 31.85 $\pm$ 1.60       | 68.63           |             |             |             |                |
|          |                  | 4    | 14.70 $\pm$ 0.98       | 79.09           |             |             |             |                |
| 6KUR     | Room temperature | 1    | 71.28 $\pm$ 2.40       | 0               | Logarithmic | -46.62ln(x) | 67.11       | 0.96           |
|          |                  | 2    | 26.95 $\pm$ 1.55       | 62.19           |             |             |             |                |
|          |                  | 3    | 14.70 $\pm$ 1.02       | 79.37           |             |             |             |                |
|          |                  | 4    | 7.35 $\pm$ 0.65        | 89.69           |             |             |             |                |
| Purple   | Room temperature | 1    | 4.91 $\pm$ 0.30        | 0               | Logarithmic | -1.909ln(x) | 4.8946      | 0.96           |
|          | data             | 2    | 3.68 $\pm$ 0.25        | 25.05           |             |             |             |                |
|          | data             | 3    | 2.46 $\pm$ 0.18        | 49.9            |             |             |             |                |
|          | data             | 4    | 2.46 $\pm$ 0.17        | 49.9            |             |             |             |                |
| Yellow   | Room temperature | 1    | 7.35 $\pm$ 0.45        | 0               | Logarithmic | -5.017ln(x) | 7.2959      | 0.97           |
|          |                  | 2    | 3.43 $\pm$ 0.28        | 53.33           |             |             |             |                |
|          |                  | 3    | 2.46 $\pm$ 0.20        | 66.53           |             |             |             |                |
|          | data             | 4    | 0.00 $\pm$ 0.00        | 100             |             |             | data        |                |
| White    | Room temperature | 1    | 5.00 $\pm$ 0.35        | 0               | Logarithmic | -3.556ln(x) | 5.00        | 1.00           |
|          |                  | 2    | 2.50 $\pm$ 0.22        | 50              |             |             |             |                |
|          |                  | 3    | 1.20 $\pm$ 0.15        | 76              |             |             |             |                |
|          |                  | 4    | 0.01 $\pm$ 0.01        | 99.8            |             |             |             |                |
| 14BER    | Refrigeration    | 1    | 83.28 $\pm$ 2.80       | 0               | Logarithmic | -39.71ln(x) | 77.48       | 0.89           |
|          |                  | 2    | 39.19 $\pm$ 1.95       | 52.94           |             |             |             |                |
|          |                  | 3    | 22.05 $\pm$ 1.33       | 61.76           |             |             |             |                |
|          |                  | 4    | 29.40 $\pm$ 1.45       | 64.7            |             |             |             |                |
| 6KUR     | Refrigeration    | 1    | 81.57 $\pm$ 2.65       | 0               | Logarithmic | -36.49ln(x) | 81.965      | 0.99           |
|          |                  | 2    | 56.34 $\pm$ 2.30       | 30.93           |             |             |             |                |

|        |               |   |                  |       |             |                |        |      |
|--------|---------------|---|------------------|-------|-------------|----------------|--------|------|
|        |               | 3 | $44.58 \pm 1.85$ | 45.34 |             |                |        |      |
|        |               | 4 | $29.40 \pm 1.40$ | 63.96 |             |                |        |      |
|        |               | 1 | $7.35 \pm 0.50$  | 0     |             |                |        |      |
|        |               | 2 | $4.91 \pm 0.35$  | 33.2  |             |                |        |      |
| Purple | Refrigeration | 3 | $4.91 \pm 0.32$  | 33.2  | Logarithmic | $-1.925\ln(x)$ | 6.99   | 0.83 |
|        |               | 4 | $0.00 \pm 0.00$  | 36.6  |             |                |        |      |
|        |               | 1 | $9.80 \pm 0.60$  | 0     |             |                |        |      |
|        |               | 2 | $7.35 \pm 0.45$  | 53.33 |             |                |        |      |
| Yellow | Refrigeration | 3 | $4.91 \pm 0.35$  | 66.53 | Logarithmic | $-5.017\ln(x)$ | 7.2959 | 0.97 |
|        |               | 4 | $0.00 \pm 0.00$  | 100   |             |                |        |      |
|        |               | 1 | $6.00 \pm 0.40$  | 0     |             |                |        |      |
|        |               | 2 | $3.50 \pm 0.28$  | 41.67 |             |                |        |      |
| White  | Refrigeration | 3 | $2.00 \pm 0.20$  | 66.67 | Logarithmic | $-3.556\ln(x)$ | 5.00   | 1.00 |
|        |               | 4 | $0.01 \pm 0.01$  | 99.83 |             |                |        |      |
|        |               | 1 | $6.00 \pm 0.40$  | 0     |             |                |        |      |
|        |               | 2 | $3.50 \pm 0.28$  | 41.67 |             |                |        |      |
